# Supplementary material
Source: HighWire-hosted journal article supplement (https://bmjopenrespres.bmj.com/content/5/1/e000274)
Supplement: inline-supplementary-material-4 [file inline-supplementary-material-4.pdf]

**Table S2. Fold Changes of Metabolites in Refined Profile**

|                                             |    |
|---------------------------------------------|----|
| <b>Fold Change: Cases of WTC-LI/Control</b> |    |
|                                             | <1 |
|                                             | >1 |

| Super Pathway                               | Sub Pathway                                      | Metabolite               | Comp ID                                      | KEGG   | HMDB      | PubChem   | WTC-LI Control | CAS        | Retention Index | Mass   |        |
|---------------------------------------------|--------------------------------------------------|--------------------------|----------------------------------------------|--------|-----------|-----------|----------------|------------|-----------------|--------|--------|
| Amino Acid                                  | Alanine and Aspartate Metabolism                 | N-acetylaspargine        | 33942                                        |        | HMDB06028 | 99715     |                | 4033-40-3  | 785             | 175.07 |        |
|                                             | Glutamate Metabolism                             | N-acetylglutamine        | 33943                                        | C02716 | HMDB06029 | 182230    |                | 2490-97-3  | 2140            | 187.07 |        |
|                                             | Glycine, Serine and Threonine Metabolism         | Dimethylglycine          | 5086                                         | C01026 | HMDB00092 | 673       |                | 1118-68-9  | 1104            | 104.07 |        |
|                                             | Leucine, Isoleucine and Valine Metabolism        |                          | Methylsuccinate                              | 15745  |           | HMDB01844 | 10349          |            | 498-21-5        | 2800   | 131.03 |
|                                             |                                                  |                          | Isobutyrylcarnitine                          | 33441  |           | HMDB00736 | 168379         |            | 25518-49-4      | 2810   | 232.15 |
|                                             | Lysine Metabolism                                |                          | N2-acetyllysine                              | 36751  | C12989    | HMDB00446 | 92907          |            | 1946-82-3       | 3372.6 | 187.11 |
|                                             | Methionine, Cysteine, SAM and Taurine Metabolism |                          | Lanthionine                                  | 42002  |           |           | 0              |            | 8/2/83          | 1730   | 209.06 |
|                                             | Phenylalanine and Tyrosine Metabolism            |                          | Vanillylmandelate (VMA)                      | 1567   | C05584    | HMDB00291 | 1245           |            | 55-10-7         | 941    | 197.05 |
| Tryptophan Metabolism                       |                                                  | Serotonin                | 2342                                         | C00780 | HMDB00259 | 5202      |                | 153-98-0   | 2550            | 177.1  |        |
| Urea cycle; Arginine and Proline Metabolism |                                                  | Proline                  | 1898                                         | C00148 | HMDB00162 | 145742    |                | 147-85-3   | 1603            | 116.07 |        |
| Carbohydrate                                | Pentose Metabolism                               | Arabonate/xylonate       | 48255                                        |        |           |           |                |            | 2664.6          | 165.04 |        |
| Cofactors and Vitamins                      | Ascorbate and Aldarate Metabolism                | Gulonate                 | 46957                                        |        | HMDB03290 | 9794176   |                | 20246-53-1 | 2750            | 195.05 |        |
|                                             |                                                  | Threonate                | 27738                                        | C01620 | HMDB00943 | 151152    |                | 70753-61-6 | 2384            | 135.03 |        |
| Lipid                                       | Fatty Acid Metabolism (also BCAA Metabolism)     | Propionylcarnitine       | 32452                                        | C03017 | HMDB00824 | 107738    |                | 17298-37-2 | 2590            | 218.14 |        |
|                                             | Fatty Acid, Dicarboxylate                        | Azelate (nonanedioate)   | 18362                                        | C08261 | HMDB00784 | 2266      |                | 123-99-9   | 1276            | 187.1  |        |
|                                             | Fatty Acid, Monohydroxy                          |                          | 2-hydroxypalmitate                           | 35675  |           | HMDB31057 | 92836          |            | 764-67-0        | 5511.2 | 271.23 |
|                                             |                                                  |                          | 2-hydroxystearate                            | 17945  | C03045    |           | 69417          |            | 629-22-1        | 5695   | 299.26 |
|                                             | Lysolipid                                        |                          | 1-arachidonoyl-GPE (20:4n6)                  | 35186  |           | HMDB11517 | 42607465       |            |                 | 1450   | 502.29 |
|                                             | Phospholipid Metabolism                          |                          | 1-palmitoyl-2-arachidonoyl-GPC (16:0/20:4n6) | 52462  |           |           | 10747814       |            | 35418-58-7      | 2091   | 782.57 |
|                                             |                                                  |                          | 1-stearoyl-2-arachidonoyl-GPC (18:0/20:4)    | 42450  |           |           | 16219824       |            | 35418-59-8      | 2300   | 810.6  |
|                                             |                                                  |                          | Docosahexaenoylcholine                       | 53263  |           |           |                |            |                 | 1378   | 414.34 |
|                                             | Polyunsaturated Fatty Acid (n3 and n6)           |                          | Arachidonate (20:4n6)                        | 1110   | C00219    | HMDB01043 | 444899         |            | 506-32-1        | 5535   | 303.23 |
|                                             | Sphingolipid Metabolism                          |                          | Sphingosine                                  | 17747  | C00319    | HMDB00252 | 5353955        |            | 123-78-4        | 1393   | 300.29 |
| Sphinganine                                 |                                                  |                          | 17769                                        | C00836 | HMDB00269 | 3126      |                | 3102-56-5  | 1413            | 302.31 |        |
| Lignoceroyl sphingomyelin (d18:1/24:0)      |                                                  |                          | 57330                                        |        |           |           |                |            | 60037-60-7      | 3437   | 815.7  |
| Sphingosine 1-phosphate                     |                                                  |                          | 34445                                        | C06124 | HMDB00277 | 5283560   |                |            | 26993-30-6      | 1850   | 378.24 |
| Nucleotide                                  | Pyrimidine Metabolism, Uracil containing         | Uridine                  | 606                                          | C00299 | HMDB00296 | 6029      |                | 58-96-8    | 1457.6          | 243.06 |        |
| Peptide                                     | Dipeptide                                        | Prolylglycine            | 40703                                        |        |           | 0         |                | 2578-57-6  | 2136            | 173.09 |        |
| Xenobiotics                                 | Benzoate Metabolism                              | 4-methylcatechol sulfate | 46146                                        |        |           |           |                |            | 2665            | 203    |        |
